# Supplementary material
Source: PubMed Central journal article supplement (PMC122775)

***a***

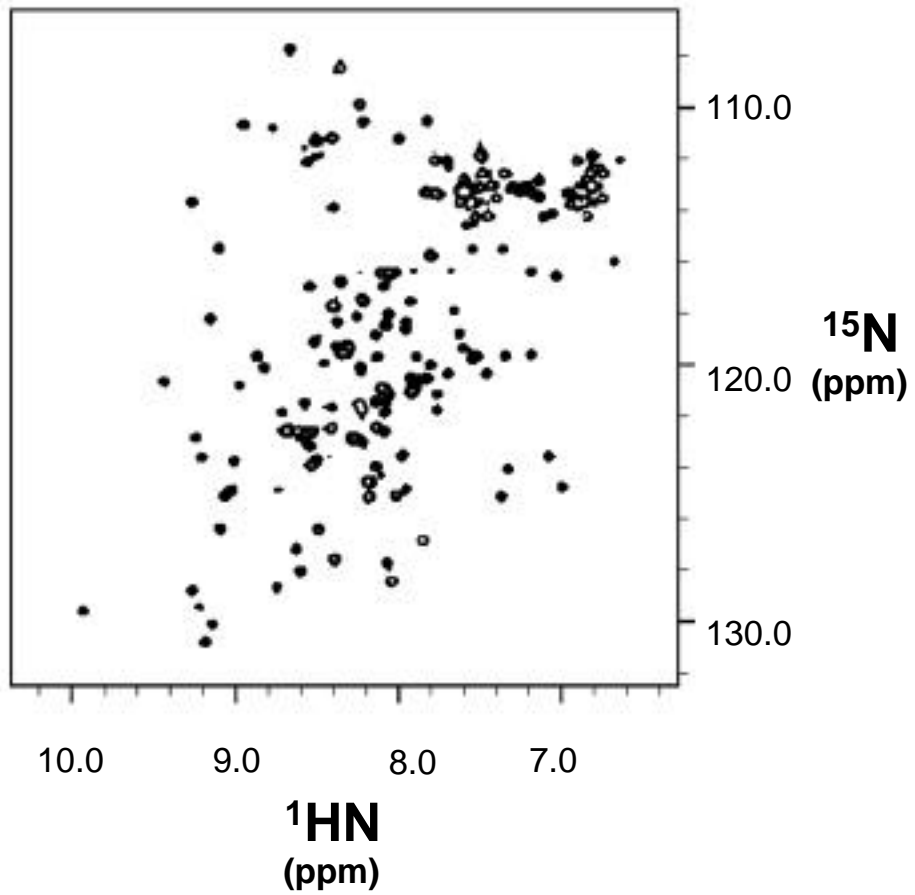

***b***

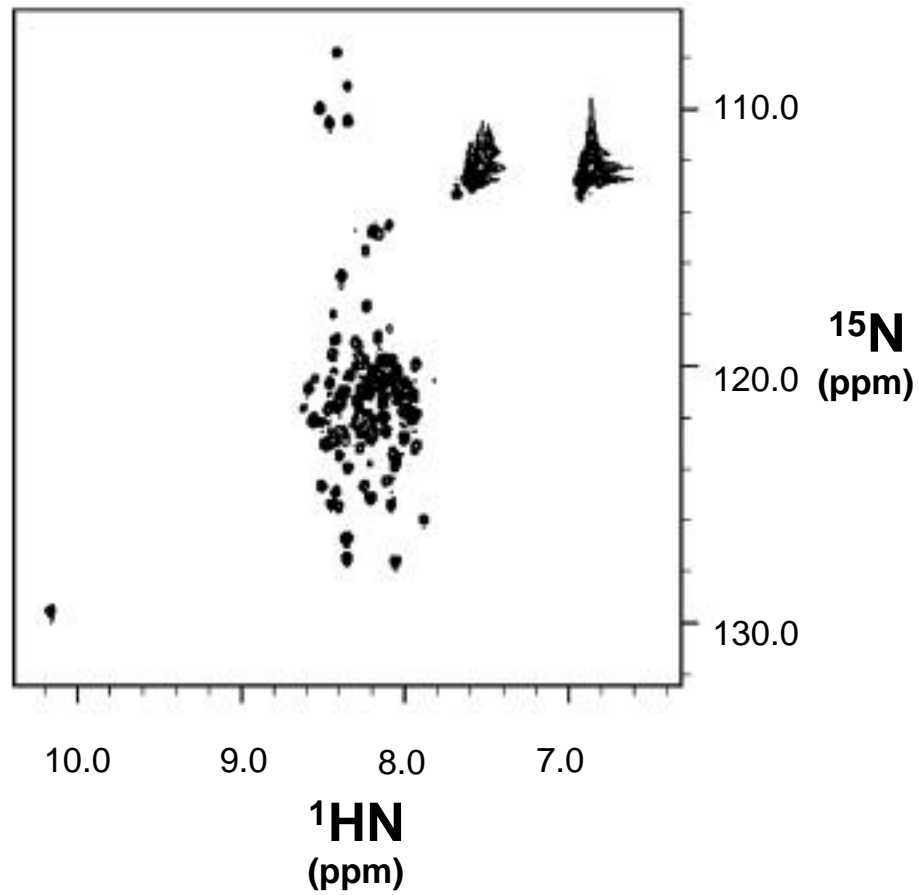

Supplement: pnas_99_8_5367__1.pdf [file pnas_99_8_5367__1.pdf]

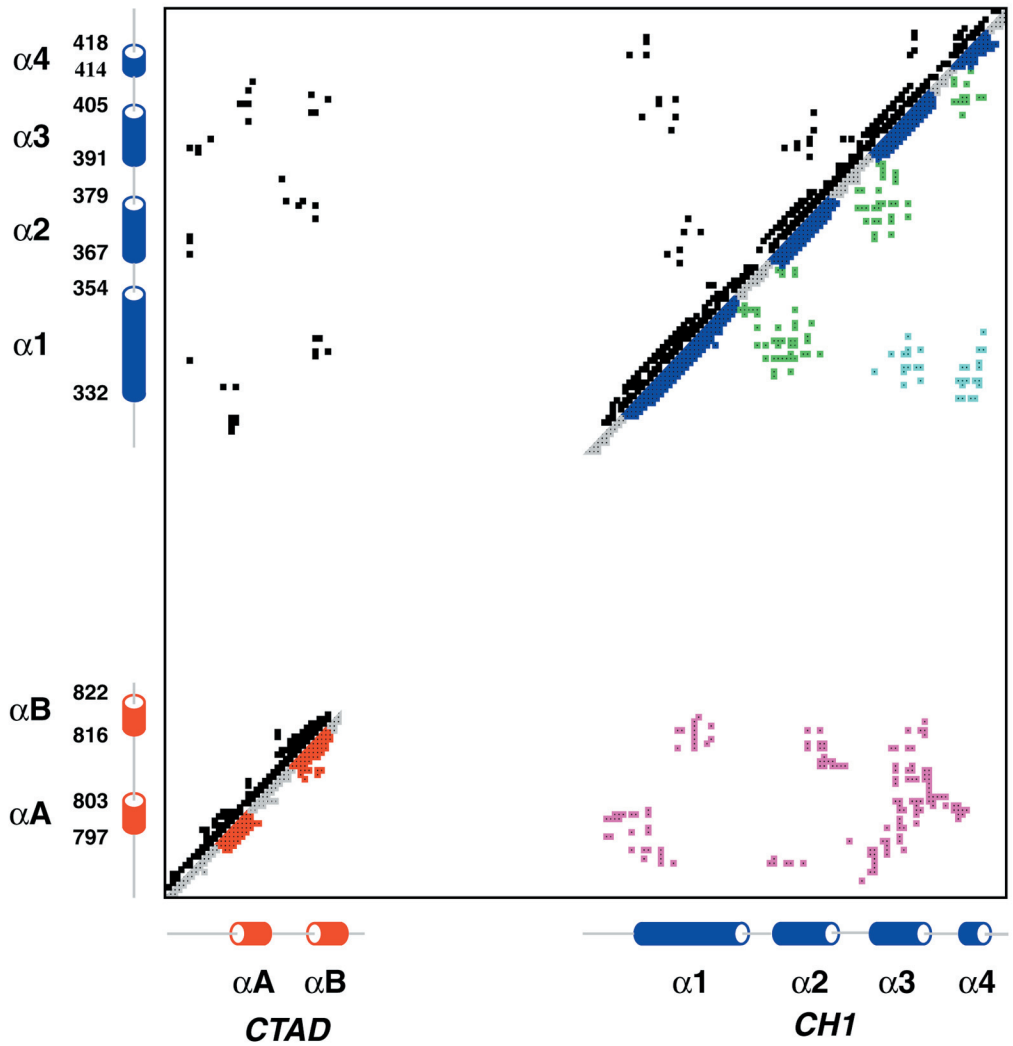

Supplement: pnas_99_8_5367__3.pdf [file pnas_99_8_5367__3.pdf]
